# Supplementary material
Source: PubMed Central journal article supplement (PMC4006998)
Supplement: NIHMS569647-supplement-SI_Tables___Figures.pdf [file NIHMS569647-supplement-SI_Tables___Figures.pdf]

## **Supplementary Material**

Molecular docking and ligand specificity in fragment-based inhibitor discovery

Chen & Shoichet

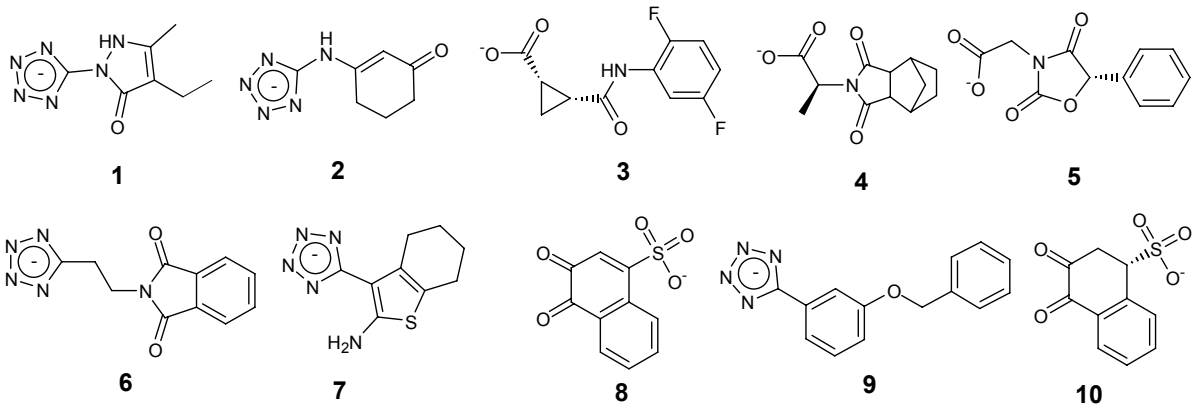

(a)

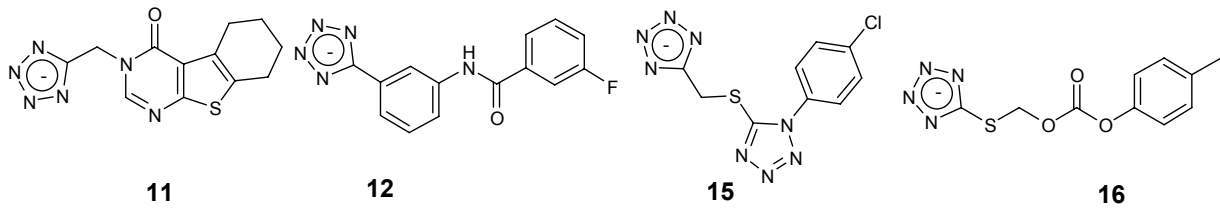

(b)

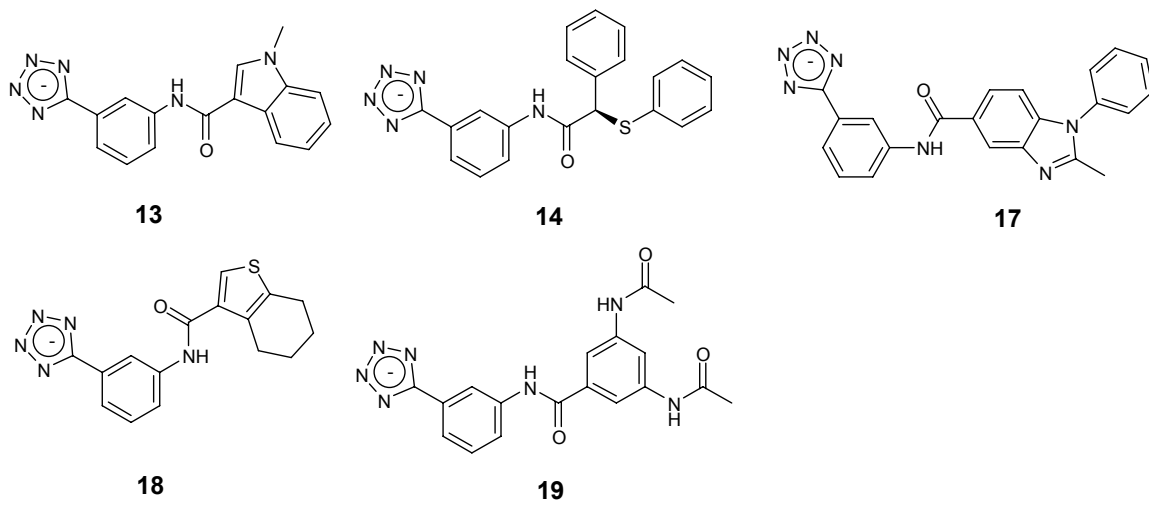

(c)

**Figure S1** Inhibitors identified against CTX-M.  $K_i$  values were determined for compounds **1-4, 6, 11, 12, 13** and **14**, the first seven of which were also crystallized. (a) Fragment inhibitors identified by molecular docking. All had  $IC_{50} \sim$ mM. Compounds **1, 4, 5** were also previously identified as inhibitors against AmpC. (b) Lead-like tetrazole compounds selected by molecular docking. Their  $K_i$  values ranged from mM to sub-mM with the best at 21  $\mu$ M (compound **12**). (c) Analogs of the most potent tetrazole inhibitor from docking, identified by similarity search. All inhibited CTX-M at 250  $\mu$ M and the best has  $K_i$  at 10  $\mu$ M (compound **13**).

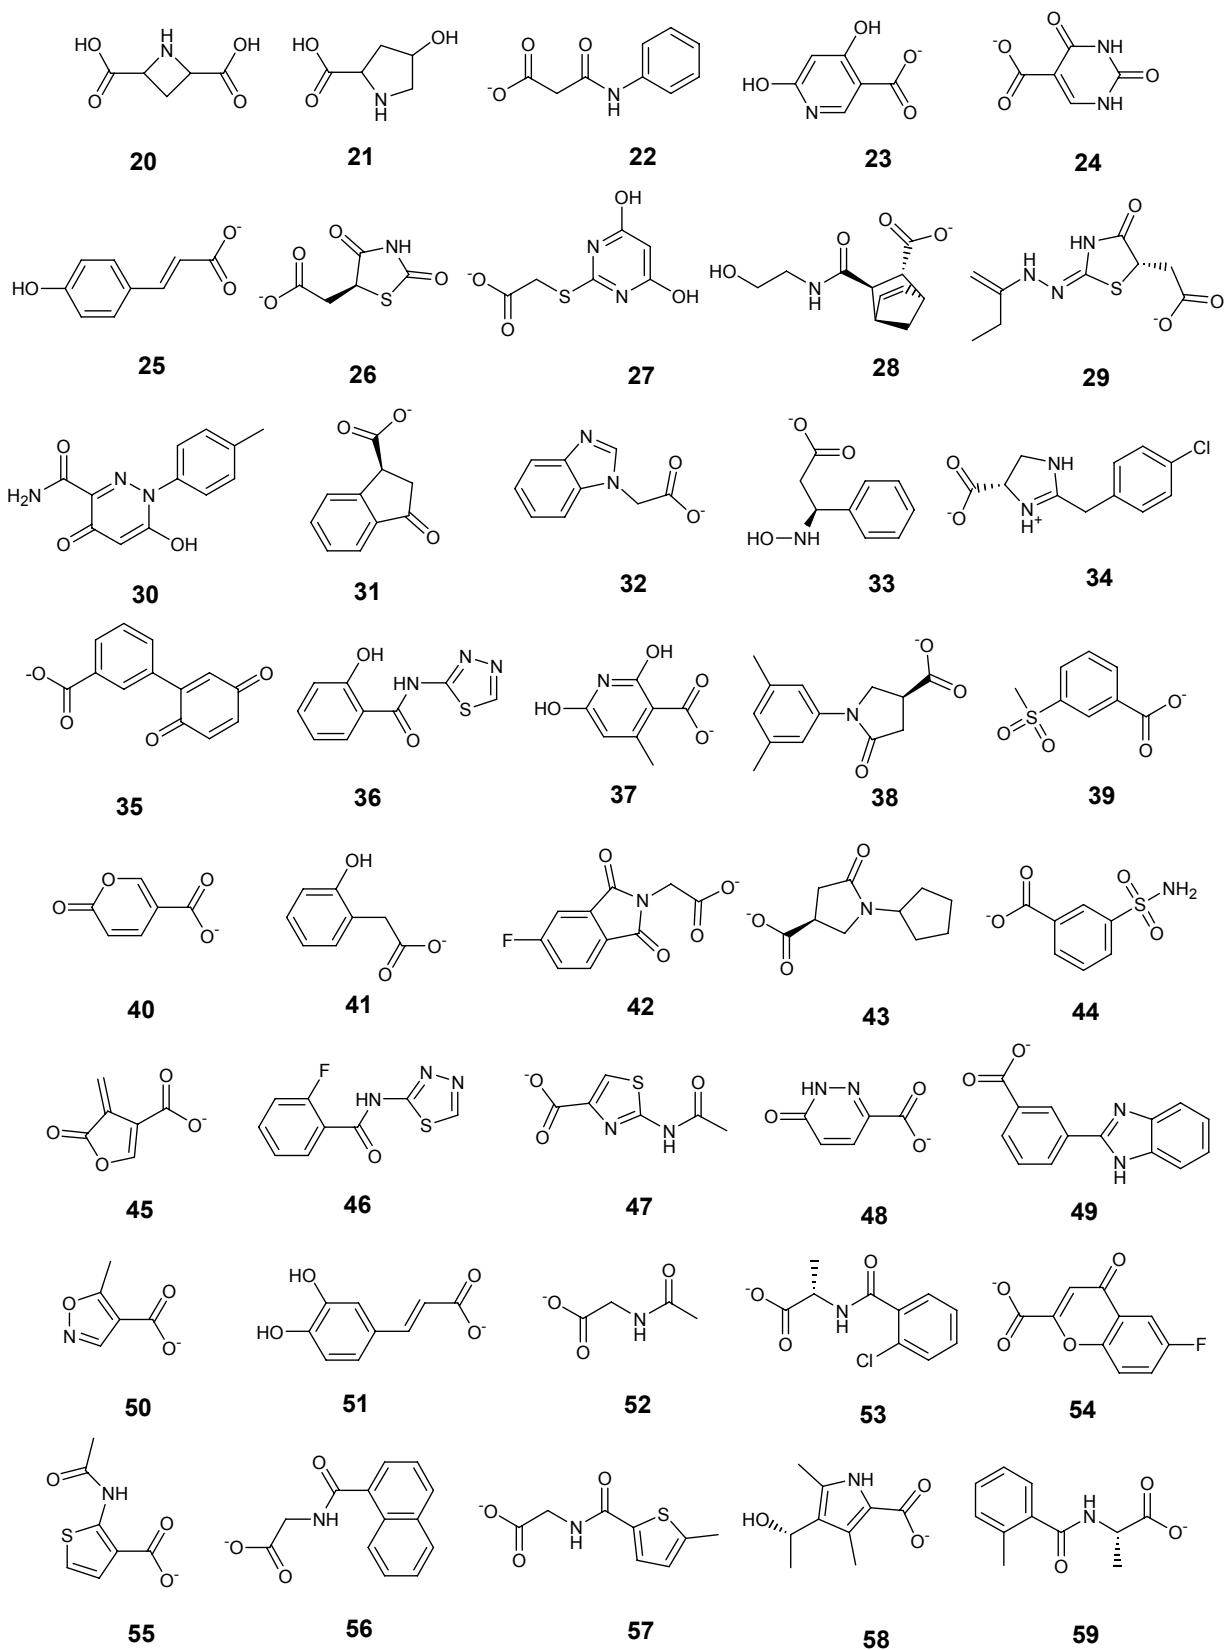

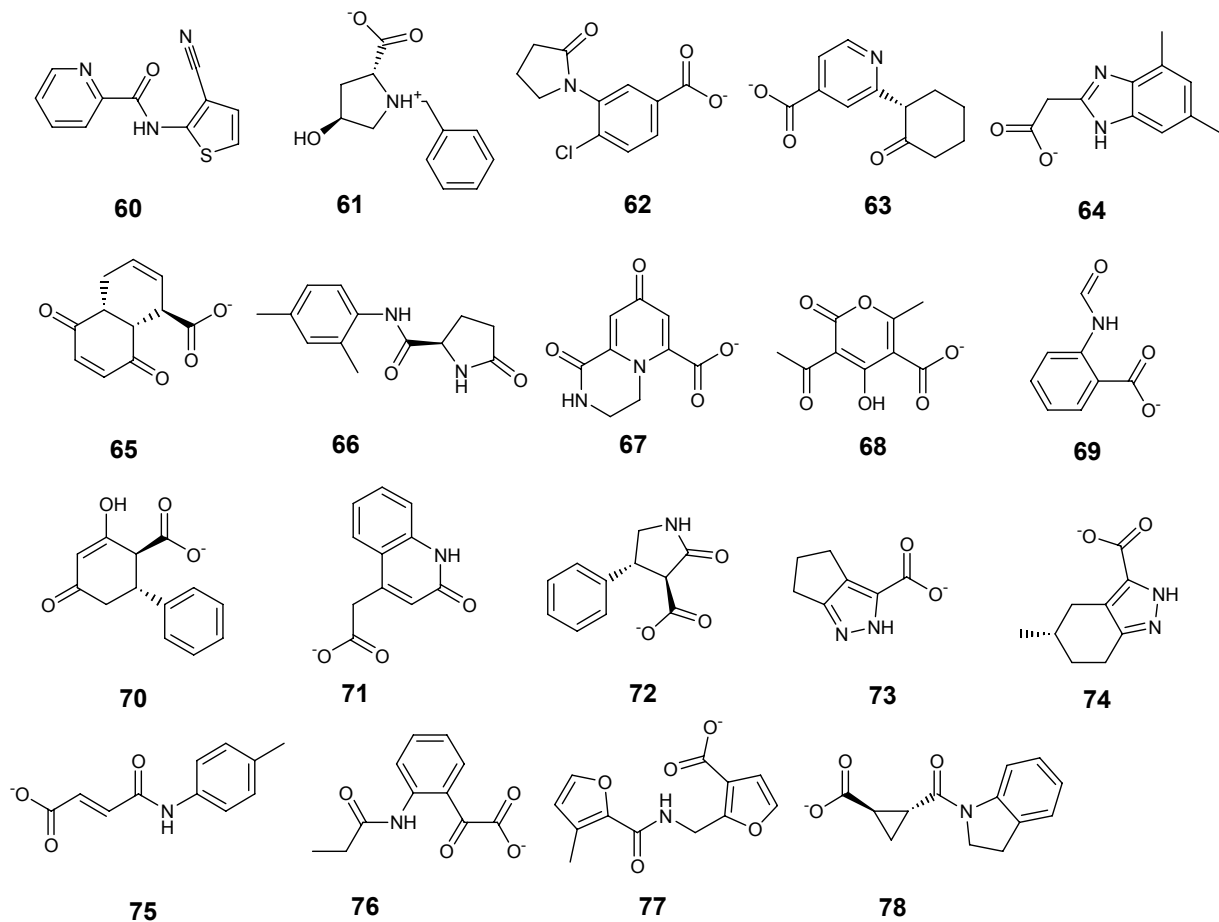

**Figure S2** Non-binding fragments selected by docking. These compounds did not inhibit CTX-M when tested at up to 5 mM concentrations, or as their solubility allowed.



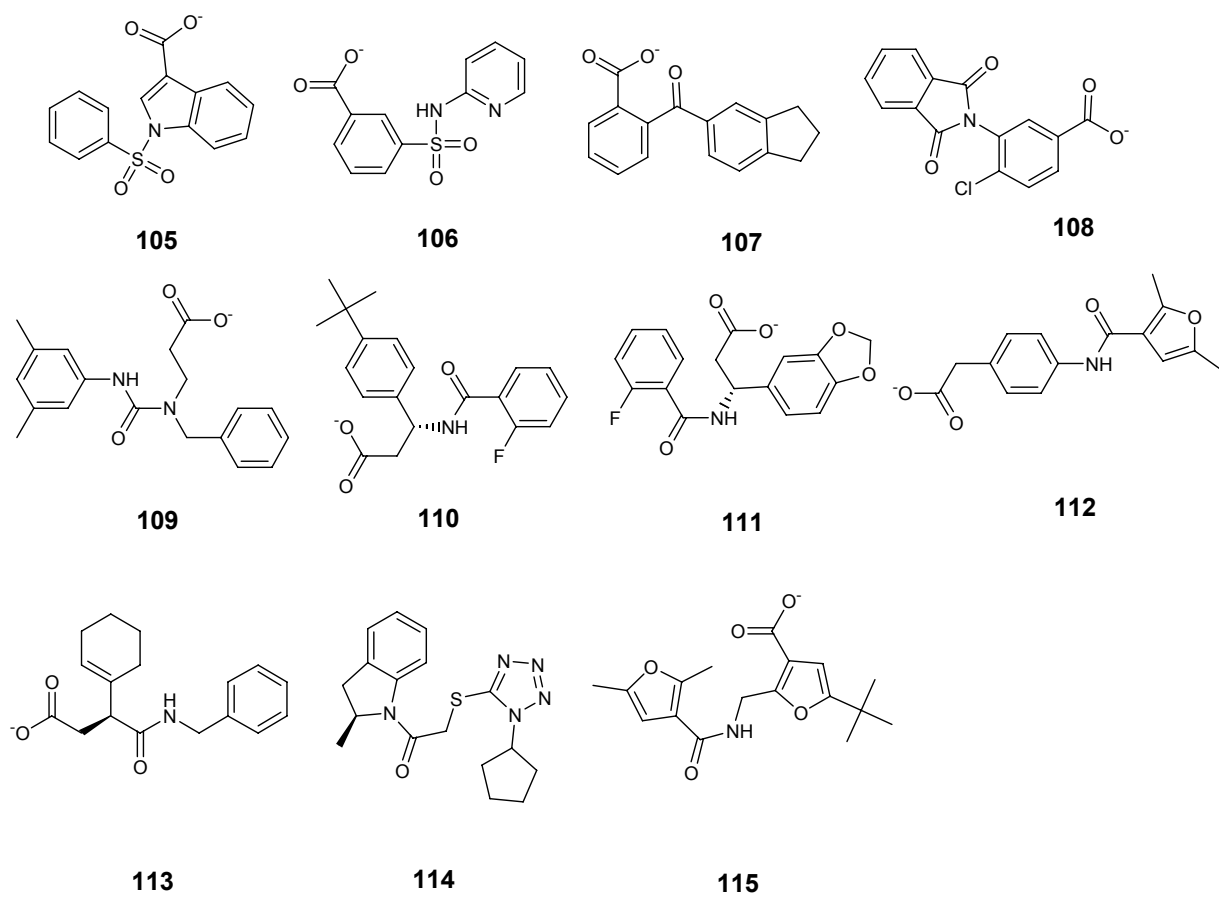

**Figure S3** Non-binding lead-like compounds selected by docking. These compounds did not inhibit CTX-M when tested at up to 5 mM concentrations, or as their solubility allowed.

**Table S1** Fragment database compounds most similar to ligands

| #  | ligand | Whole database <sup>a</sup> |                    | Cluster centers <sup>b</sup> |        | Random cluster set <sup>c</sup> |        |
|----|--------|-----------------------------|--------------------|------------------------------|--------|---------------------------------|--------|
|    |        | structure                   | score <sup>d</sup> | structure                    | score  | structure                       | score  |
| 1  |        |                             | 0.3878             |                              | 0.3125 |                                 | 0.2449 |
| 2  |        |                             | 0.4688             |                              | 0.4324 |                                 | 0.3243 |
| 3  |        |                             | 0.7500             |                              | 0.3077 |                                 | 0.2889 |
| 4  |        |                             | 0.7273             |                              | 0.2857 |                                 | 0.4545 |
| 5  |        |                             | 0.6829             |                              | 0.2708 |                                 | 0.3636 |
| 6  |        |                             | 0.4872             |                              | 0.3571 |                                 | 0.2745 |
| 7  |        |                             | 0.4250             |                              | 0.3571 |                                 | 0.3250 |
| 8  |        |                             | 0.7037             |                              | 0.2973 |                                 | 0.3636 |
| 9  |        |                             | 0.6250             |                              | 0.2979 |                                 | 0.3600 |
| 10 |        |                             | 0.4167             |                              | 0.3077 |                                 | 0.3158 |

- Latest fragment subset of ZINC database, 317,000 compounds.
- The compounds that are the centers of the 2500 clusters from the fragment database.
- The compounds randomly chosen from the 2500 clusters (one from each cluster).
- Tanimoto similarity score between the ligand and the compound using ECFP-4 fingerprint.



**Table S2 Crystallographic statistics**

| <b>Compound #</b>                    | <b>1</b>        | <b>2</b>        | <b>3</b>          | <b>4</b>        | <b>6</b>        | <b>11</b>       | <b>12</b>       |
|--------------------------------------|-----------------|-----------------|-------------------|-----------------|-----------------|-----------------|-----------------|
| <b>Data collection</b>               |                 |                 |                   |                 |                 |                 |                 |
| Space group                          | P2 <sub>1</sub> | P2 <sub>1</sub> | P322 <sub>1</sub> | P2 <sub>1</sub> | P2 <sub>1</sub> | P2 <sub>1</sub> | P2 <sub>1</sub> |
| Cell dimensions                      |                 |                 |                   |                 |                 |                 |                 |
| <i>a, b, c</i> (Å)                   | 45.154          | 45.211          | 41.803            | 45.279          | 45.110          | 45.141          | 45.265          |
|                                      | 106.877         | 107.256         | 41.803            | 106.765         | 107.098         | 106.886         | 107.243         |
|                                      | 47.703          | 47.512          | 230.542           | 47.777          | 47.477          | 47.445          | 47.727          |
| $\alpha, \beta, \gamma$ (°)          | 90.000          | 90.000          | 90.000            | 90.000          | 90.000          | 90.000          | 90.000          |
|                                      | 101.906         | 101.678         | 90.000            | 101.74          | 101.660         | 101.628         | 99.932          |
|                                      | 90.000          | 90.000          | 120.000           | 90.000          | 90.000          | 90.000          | 90.000          |
| Resolution (Å)                       | 50.0-1.31       | 50.0 – 1.50     | 50.0 – 1.80       | 50-1.70         | 50.0-1.31       | 50.0-1.31       | 50.0 – 1.41     |
|                                      | (1.36-1.31)*    | (1.55-1.50)     | (1.86-1.80)       | (1.76-1.70)     | (1.36-1.31)     | (1.36-1.31)     | (1.46-1.41)     |
| R <sub>merge</sub> (%)               | 5.1 (21.2)      | 4.6 (34.5)      | 5.6 (57.1)        | 7.7 (34.1)      | 5.1 (27.1)      | 4.7 (24.9)      | 4.4 (30.0)      |
| <i>I</i> / $\sigma$ <i>I</i>         | 11.3(2.9)       | 15.0 (2.0)      | 20.7 (2.0)        | 10.8 (2.4)      | 20.6 (4.0)      | 22.6 (5.1)      | 16.7 (2.6)      |
| Completeness(%)                      | 91.6 (96.7)     | 98.3 (93.5)     | 99.7 (98.5)       | 98.6 (87.1)     | 99.4 (98.3)     | 99.9 (99.9)     | 98.6 (94.0)     |
| Redundancy                           | 1.8 (1.7)       | 2.5 (2.0)       | 7.4 (5.9)         | 3.5 (2.9)       | 3.9 (3.7)       | 3.9 (3.6)       | 2.5 (2.2)       |
| <b>Refinement</b>                    |                 |                 |                   |                 |                 |                 |                 |
| Resolution (Å)                       | 50.0-1.31       | 50.0-1.50       | 50.0-1.80         | 50.0-1.70       | 50.0-1.31       | 50.0-1.31       | 50.0-1.41       |
|                                      | (1.36-1.31)     | (1.55-1.50)     | (1.86-1.80)       | (1.76-1.70)     | (1.36-1.31)     | (1.36-1.31)     | (1.46-1.41)     |
| No. reflections                      | 96597 (10197)   | 69190 (6567)    | 22803 (2167)      | 48236 (4241)    | 104717(10346)   | 106059(10591)   | 84588 (8057)    |
| R <sub>work</sub> /R <sub>free</sub> | 16.1 / 18.8     | 15.1/ 18.8      | 20.8 / 24.5       | 16.8 / 20.3     | 15.2 / 18.2     | 15.5 (18.0)     | 15.5 / 18.2     |
| No. atoms                            |                 |                 |                   |                 |                 |                 |                 |
| Protein                              | 4057            | 3989            | 1997              | 3952            | 4064            | 4051            | 3996            |
| Ligand/ion                           | 40              | 54              | 51                | 107             | 83              | 102             | 134             |
| Water                                | 613             | 576             | 157               | 356             | 677             | 652             | 607             |
| <i>B</i> -factors (Å <sup>2</sup> )  |                 |                 |                   |                 |                 |                 |                 |
| Protein                              | 11.39           | 16.90           | 24.25             | 14.71           | 11.96           | 11.14           | 14.52           |
| Ligand/ion                           | 23.68           | 22.50           | 35.41             | 27.33           | 20.83           | 16.73           | 25.36           |
| Water                                | 23.25           | 30.95           | 33.12             | 23.13           | 26.33           | 24.65           | 30.11           |
| r.m.s. deviations                    |                 |                 |                   |                 |                 |                 |                 |
| bond lengths (Å)                     | 0.007           | 0.008           | 0.017             | 0.012           | 0.006           | 0.006           | 0.007           |
| bond angles (°)                      | 1.385           | 1.277           | 1.697             | 1.668           | 1.393           | 1.325           | 1.164           |

\* Values in parenthesis represent highest resolution shells.
